# Supplementary material for: RNA-binding specificity landscape of the pentatricopeptide repeat protein PPR10
Source: PubMed Central journal article supplement — RNA. 2017 Apr;23(4):586–99. doi: 10.1261/rna.059568.116 (PMC5340921; doi:10.1261/rna.059568.116), 2017-04
Supplement: supp_059568.116_Supplemental_Fig_S1.pdf [file supp_059568.116_Supplemental_Fig_S1.pdf]

**A**

| Sample           | Read Counts   |                |               |             | Number of Distinct Sequences |                |               |           |
|------------------|---------------|----------------|---------------|-------------|------------------------------|----------------|---------------|-----------|
|                  | 5' Randomized | Mid Randomized | 3' Randomized | Total       | 5' Randomized                | Mid Randomized | 3' Randomized | Total     |
| Input            | 28,687,463    | 91,174,453     | 103,691,491   | 255,326,507 | 964,513                      | 983,624        | 1,042,185     | 2,990,322 |
| PPR10 WT         | 272,260       | 697,915        | 2,291,180     | 3,261,355   | 162,495                      | 256,469        | 546,262       | 965,226   |
| PPR10 Rpt15(TD)  | 186,282       | 676,097        | 1,941,153     | 2,803,532   | 128,225                      | 248,198        | 514,407       | 890,830   |
| PPR10 Rpt6.7(TD) | 328,444       | 1,045,231      | 1,766,564     | 3,140,239   | 167,926                      | 286,778        | 512,054       | 966,758   |
| PPR10 Rpt6.7(TN) | 292,532       | 932,667        | 2,047,142     | 3,272,431   | 176,260                      | 291,341        | 540,286       | 1,007,887 |
| PPR10 Rpt7(ND)   | 201,295       | 473,212        | 1,315,960     | 1,990,467   | 107,159                      | 198,429        | 382,511       | 688,099   |

**B**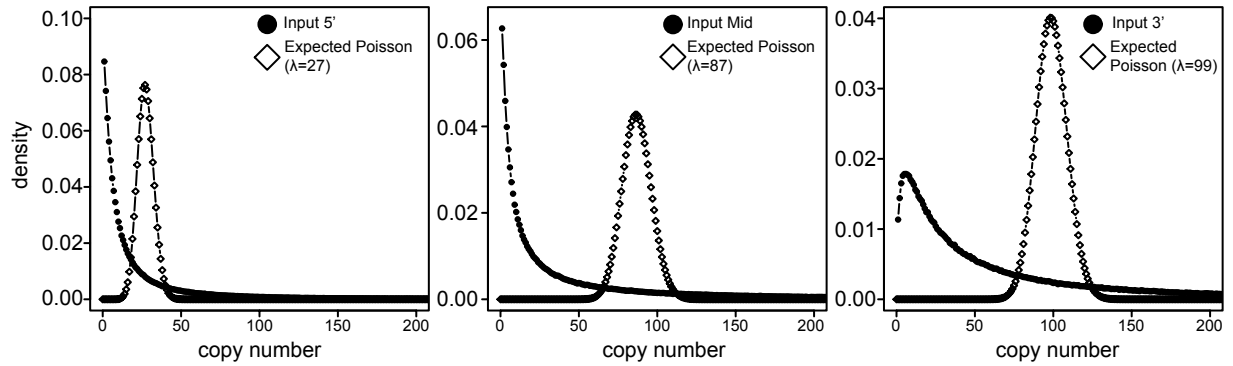**C**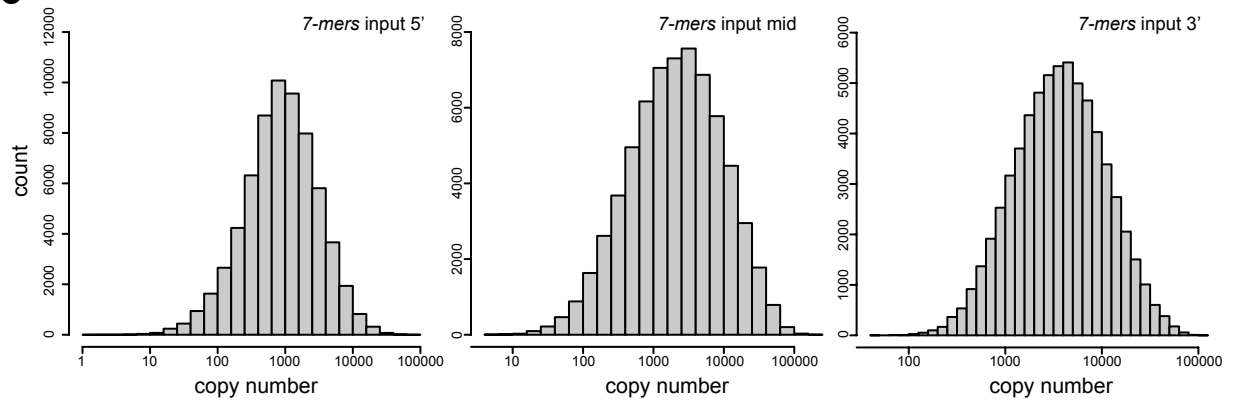

**SUPPLEMENTAL FIGURE S1.** Overview of bind-n-seq read counts. (A) Number of reads and distinct sequences from each pool in each bind-n-seq assay. (B) Frequency distribution of sequences with various copy numbers in the input RNA pool. The distributions for the 5', middle and 3' randomized RNA pools are shown to the left, middle, and right, respectively, and are overlaid with the expectation based on a Poisson distribution. Lambda was calculated as the number of input reads divided by 410, the theoretical number of sequences represented by each partially randomized oligonucleotide. (C) Frequency distribution of 7-mers found in various copy number in the input RNA pool. 99% of the 196,608 possible 7-mers were represented at least 50 times in the sequenced aliquot of input RNA.
