# Supplementary material for: RNA-binding specificity landscape of the pentatricopeptide repeat protein PPR10
Source: PubMed Central journal article supplement — RNA. 2017 Apr;23(4):586–99. doi: 10.1261/rna.059568.116 (PMC5340921; doi:10.1261/rna.059568.116), 2017-04
Supplement: supp_059568.116_Supplemental_Fig_S2.pdf [file supp_059568.116_Supplemental_Fig_S2.pdf]

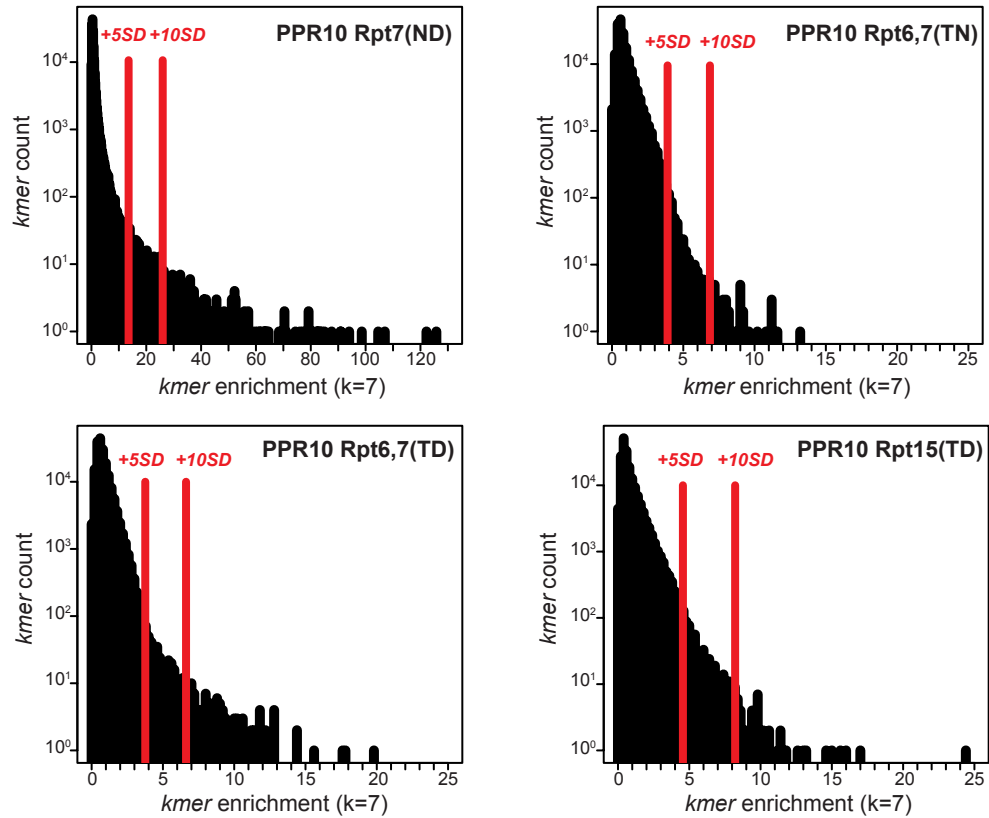

**SUPPLEMENTAL FIGURE S2.** Distribution of 7-mer enrichment values in bind-n-seq experiments involving PPR10 variants. Enrichment values were calculated for each 7-mer at each position as the frequency of that 7-mer in the bound fraction divided by its frequency at the same position in the input library. The subset of 7-mers that were enriched more than 5 or 10 standard deviations above the mean are marked.
